# Supplementary material for: The fluorescence distinction of chiral enantiomers: a Zn coordination polymer sensor for the detection of cinchonine and cinchonidine
Source: Royal Society of Chemistry journal article supplement (doi:10.1039/d4tc03506b), 2024-10-21
Supplement: d4tc03506b1.pdf [file d4tc03506b1.pdf]

## *Supporting Information*

# **The fluorescence distinction of chiral compounds: a Zn coordination polymer sensor for the detection of cinchonine and cinchonidine**

Wenping Hu,<sup>a</sup> Nan Wu,<sup>a</sup> Dechao Li,<sup>a</sup> Yefang Yang,<sup>a</sup> Shaowen Qie,<sup>a</sup> Shuai Su,<sup>a</sup>

Ruijie Xu,<sup>a</sup> Wenting Li,<sup>a</sup> Ming Hu\*<sup>a</sup>

<sup>a</sup> Inner Mongolia Key Laboratory of Chemistry and Physics of Rare Earth Materials; School of Chemistry and Chemical Engineering, Inner Mongolia University, Hohhot 010021, China. E-mail addresses: [hm988@126.com](mailto:hm988@126.com).

### **Table of Contents**

|                                                                                                                                                                                                                                                                         |          |
|-------------------------------------------------------------------------------------------------------------------------------------------------------------------------------------------------------------------------------------------------------------------------|----------|
| <b>1. Experimental</b> .....                                                                                                                                                                                                                                            | <b>2</b> |
| 1.1 Reagents and Instrumentation.....                                                                                                                                                                                                                                   | 2        |
| 1.2 Synthesis of <b>IMU-Zn1</b> .....                                                                                                                                                                                                                                   | 2        |
| 1.3 Crystallographic data collection and refinement .....                                                                                                                                                                                                               | 3        |
| 1.4 Fluorescence measurements .....                                                                                                                                                                                                                                     | 3        |
| 1.5 The test method of liquid nuclear magnetic resonance hydrogen spectrometry ..                                                                                                                                                                                       | 3        |
| 1.6 Computational method .....                                                                                                                                                                                                                                          | 3        |
| 1.7 Cycling Experiment.....                                                                                                                                                                                                                                             | 3        |
| <b>2.Supporting Figures</b> .....                                                                                                                                                                                                                                       | <b>4</b> |
| Fig. S1 (a) The structure of +Ccn; (b) The structure of -Ccn. ....                                                                                                                                                                                                      | 4        |
| Fig. S2 (a) One-dimensional chain structure of <b>IMU-Zn1</b> ; (b) The $\pi \cdots \pi$ interaction between layers. ....                                                                                                                                               | 4        |
| Fig. S3 Surface distribution of $d_{\text{norm}}$ plots for probe <b>IMU-Zn1</b> (a) $\text{O} \cdots \text{H}/\text{H} \cdots \text{O}$ interactions, (b) $\text{N} \cdots \text{H}/\text{H} \cdots \text{N}$ interactions and $\pi \cdots \pi$ interactions (c). .... | 5        |
| Fig. S5 (a) Excitation spectrum and (b) Fluorescence emission spectrum of <b>IMU-Zn1</b> . ....                                                                                                                                                                         | 6        |
| Fig. S6 (a) Excitation spectrum and (b) Emission spectrum of $\text{H}_2\text{PT}$ ligand. ....                                                                                                                                                                         | 6        |
| Fig. S7 Fluorescence spectra of <b>IMU-Zn1</b> in +Ccn and -Ccn. ....                                                                                                                                                                                                   | 6        |
| Fig. S8 (a) Time response of <b>IMU-Zn1</b> to +Ccn; (b) Time response of <b>IMU-Zn1</b> to -Ccn. ....                                                                                                                                                                  | 7        |
| Fig. S9 The anti-interference of <b>IMU-Zn1</b> . ....                                                                                                                                                                                                                  | 7        |
| Fig. S10 Diagram of interaction between $\text{H}_2\text{PT}$ and analytes. ....                                                                                                                                                                                        | 8        |
| Fig. S11 Attenuation and fitting curves of fluorescence lifetime of <b>IMU-Zn1</b> . ....                                                                                                                                                                               | 8        |
| Fig. S12 IR spectra of +Ccn@ <b>IMU-Zn1</b> and -Ccn@ <b>IMU-Zn1</b> .....                                                                                                                                                                                              | 9        |
| Fig. S13 (a) Zeta potential of +Ccn and <b>IMU-Zn1</b> ; (b) Zeta potential of -Ccn and <b>IMU-Zn1</b> .....                                                                                                                                                            | 9        |
| Fig. S14 3d XPS peak of N1s in <b>IMU-Zn1</b> , +Ccn@ <b>IMU-Zn1</b> and -Ccn@ <b>IMU-</b>                                                                                                                                                                              |          |

|                                                                                 |           |
|---------------------------------------------------------------------------------|-----------|
| <b>Zn1</b> .....                                                                | 9         |
| <b>3. Supporting Tables</b> .....                                               | 9         |
| Table S1 Crystallographic parameters of the <b>IMU-Zn1</b> complex. ....        | 9         |
| Table S2. Selected bond lengths [Å] and angles [°] for <b>IMU-Zn1</b> . ....    | 10        |
| Table S3. Hydrogen bonds for <b>IMU-Zn1</b> [Å and °]. ....                     | 10        |
| Table S4. Comparison of detection methods for cinchonine and cinchonidine. .... | 10        |
| <b>4.Reference</b> .....                                                        | <b>12</b> |

## 1. Experimental

### 1.1 Reagents and Instrumentation

5-(5-Pyrimindinyl)-1,3-benzenedicarboxylic acid (H<sub>2</sub>PT) is supplied by Jinan Henghua. All other chemicals were also purchased and used commercially without further purification, and the reagents used in the experiments were of analytical purity. The single crystal data was obtained on the Bruker SMART APEX II CCD X-ray single crystal diffractometer, The infrared spectrum in the 400-4000 cm<sup>-1</sup> region was recorded on the VERTEX70 spectrometer. Thermogravimetric analysis (TGA) was performed on a STA449 FJupiter analyzer heated from 30 °C to 1400 °C in a nitrogen atmosphere. Powder X-ray diffraction (PXRD) was used to characterize the crystal structure on Empyrean using Cu K $\alpha$  radiation measured at room temperature in the 2 $\theta$  range of 5°-50°. Fluorescence spectra were measured by FLS920 spectrophotometer. Ultraviolet-visible spectroscopy was recorded on the Hitachi U-3900 spectrophotometer. The <sup>1</sup>HNMR spectroscopy data were measured on AVANCE NEO.

### 1.2 Synthesis of IMU-Zn1

29.8 mg (0.10 mmol) Zn(NO<sub>3</sub>)<sub>2</sub>·6H<sub>2</sub>O and 24.4 mg (0.10 mmol) H<sub>2</sub>PT were dissolved in the mixed solvent of 3.0 mL dimethylacetamide (DMA) and 5.0 mL H<sub>2</sub>O. A well-mixed suspension was obtained after stirring thoroughly for 30 min, and transferred to a 25 mL polytetrafluoroethylene reactor. The mixture was heated at 120 °C for 4 days and then cooled down to 30 °C at a cooling rate of 5 °C h<sup>-1</sup>. Finally, pale yellowish flake crystals of **IMU-Zn1** were obtained. The crystals were washed several times with a mixture of DMA and deionized water and dried in 20.4 % yield. Elemental analysis: the composition of **IMU-Zn1**: C<sub>12</sub>H<sub>10</sub>N<sub>2</sub>O<sub>6</sub>Zn, theoretical values (%): C, 41.95; N, 8.15; H, 2.91; experimental values (%): C, 41.66; N, 8.01; H, 2.85. IR data (KBr pellet,

cm<sup>-1</sup>): 3388(s), 1616(s), 1569(s), 1447(m), 1407(s), 1380(m), 1299(s), 1174(s), 1106(s), 865(s), 765(s), 705(m), 655(m), 458(m).

### 1.3 Crystallographic data collection and refinement

The total number of runs and images was based on the strategy calculation from the program. The maximum resolution that was achieved was  $\theta = 0.79$ . The collected diffraction patterns were indexed and corrected by APEX 4. Finally, the structure of the complex was analyzed using the SHELX program in Olex 2, and the anisotropy of all non-hydrogen atoms was refined and refined using the full matrix least square method (XL) in  $F^2$  of SHELX-2018 program. Theoretical hydrogenation and various in-phase refinements were carried out.

### 1.4 Fluorescence measurements

1.1 mg **IMU-Zn1** powder was dissolved in 2.7 mL ionized water and ultrasonically stirred for 15 min. It was then prepared into a suspension with a concentration of  $1.0 \times 10^{-3}$  M. The solutions of +Ccn and -Ccn with concentrations of  $1.0 \times 10^{-2}$  M were prepared using ethanol. The analytes were slowly added to the suspension and their fluorescence spectra were measured at the room temperature. The emission spectra of the suspension for **IMU-Zn1** were collected in the wavelength range of 350 - 650 nm.

### 1.5 The test method of liquid nuclear magnetic resonance hydrogen spectrometry

A solution with a concentration of 0.05 mol/L was prepared by mixing 8.8 mg powder sample of +Ccn or -Ccn with 600  $\mu$ L of DMSO, respectively. The 7.4 mg powder sample of H<sub>2</sub>PT ligand was mixed with 600  $\mu$ L of DMSO to prepare a solution with a concentration of 0.05 mol/L. The samples with the above concentration were tested by <sup>1</sup>HNMR. The interaction between the analytes and H<sub>2</sub>PT ligand, were determined by <sup>1</sup>HNMR after mixing 600  $\mu$ L H<sub>2</sub>PT with 150  $\mu$ L +Ccn / -Ccn for 2 days.

### 1.6 Computational method

To further understand the fluorescence sensing mechanism and the nature of **IMU-Zn1**, The DFT calculations based on the B3LYP motif group were performed using Gaussian 09 to investigate the optimal geometry of the probe. The analysis was accomplished using the Multiwfn program and VMD software<sup>1-2</sup>.

## 1.7 Cycling Experiment

The powder of 20.4 mg **IMU-Zn1** was dispersed into 100 ml ethanol solution of two analytes (concentration  $1.0 \times 10^{-2}$  M) to form a suspension for testing its fluorescence intensity, respectively, then the suspension was centrifuged. The solid sample after the centrifugation was firstly washed with ethanol, and ultrasonically dispersed in 100 ml of ethanol solution to examine its fluorescence intensity once again. The above steps were repeated several times.

## 2.Supporting Figures

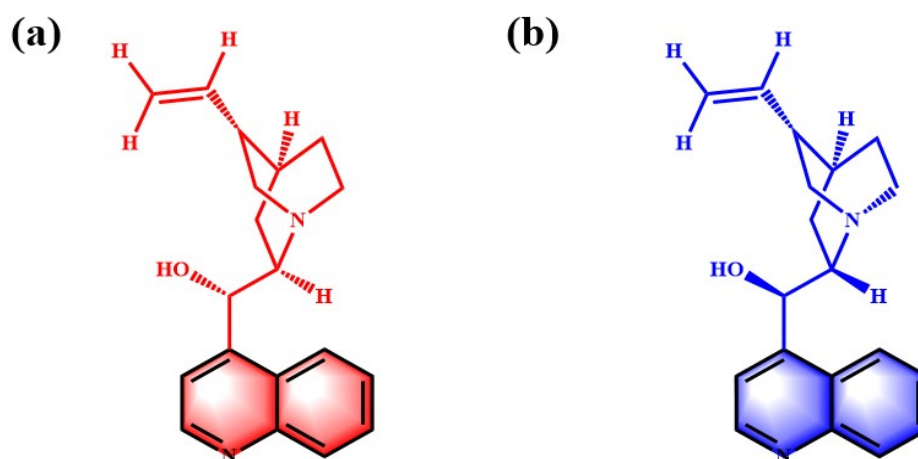

Fig. S1 (a) The structure of +Ccn; (b) The structure of -Ccn.

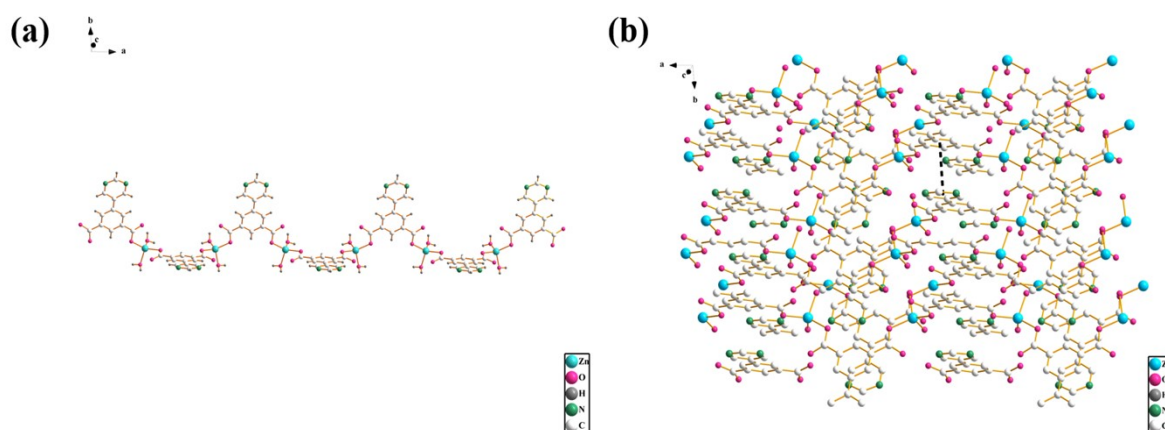

Fig. S2 (a) One-dimensional chain structure of **IMU-Zn1**; (b) The  $\pi \cdots \pi$  interaction between layers.

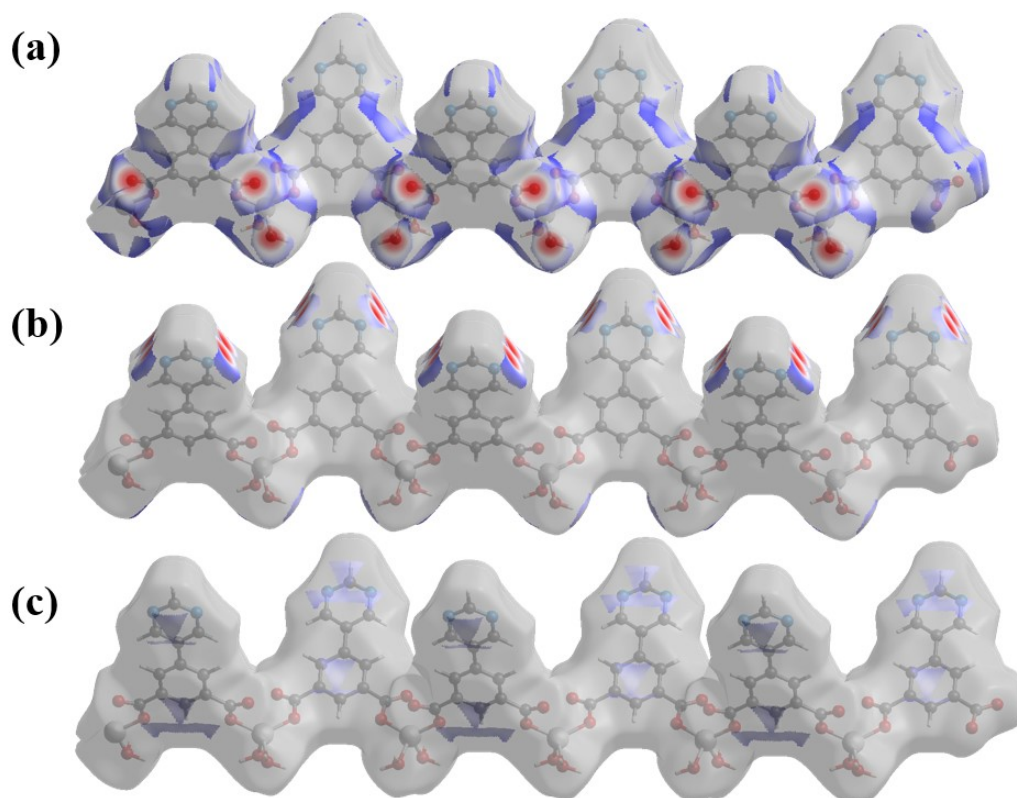

**Fig. S3** Surface distribution of  $d_{\text{norm}}$  plots for probe **IMU-Zn1** (a)  $\text{O}\cdots\text{H}/\text{H}\cdots\text{O}$  interactions, (b)  $\text{N}\cdots\text{H}/\text{H}\cdots\text{N}$  interactions and  $\pi\cdots\pi$  interactions (c).

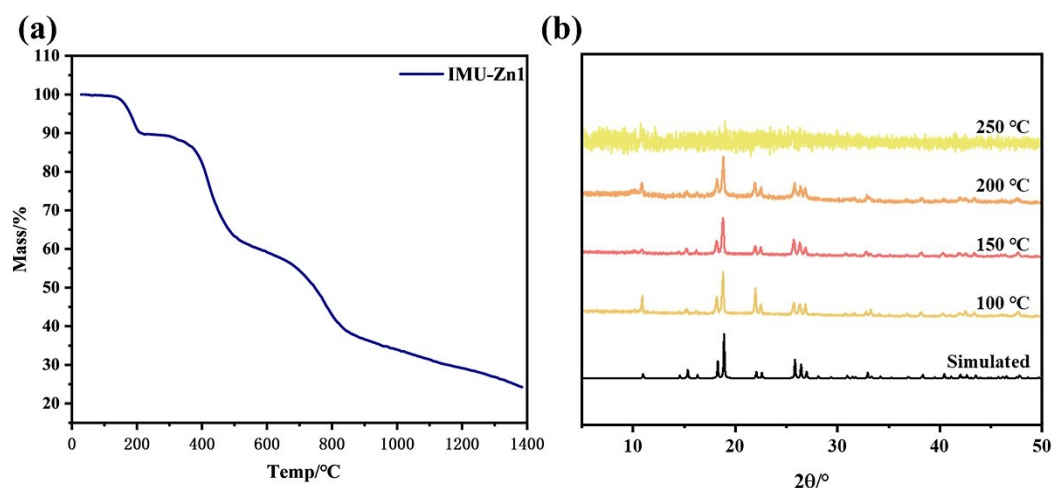

**Fig. S4** (a) The TGA curves of **MOF 1**; (b) PXRD patterns of **IMU-Zn1** in different temperature.

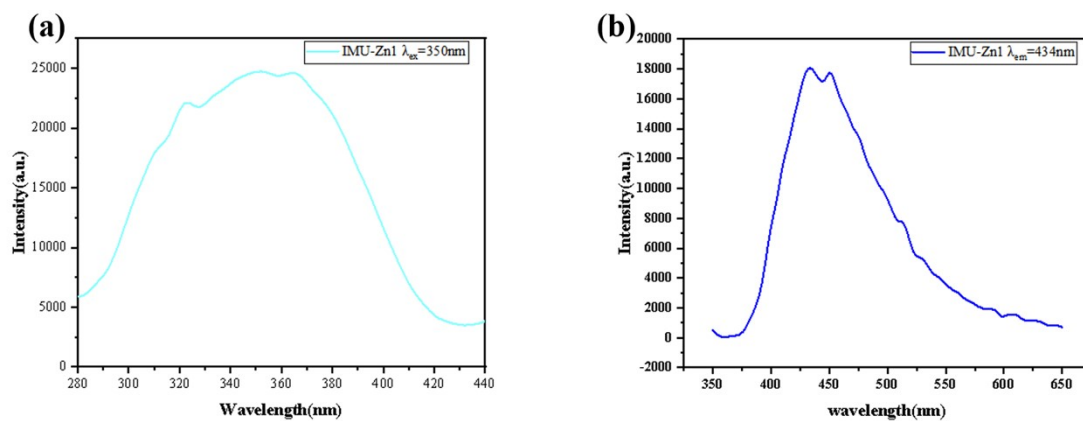

**Fig. S5 (a) Excitation spectrum and (b) Fluorescence emission spectrum of IMU-Zn1.**

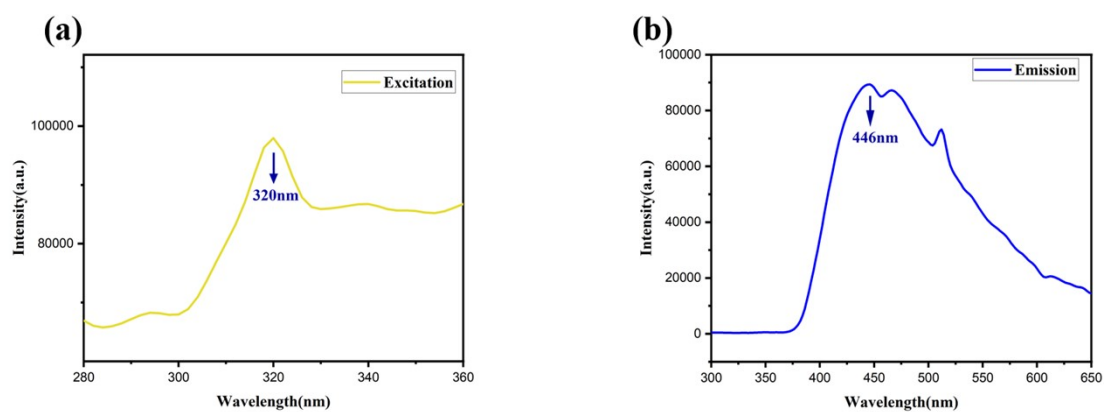

**Fig. S6 (a) Excitation spectrum and (b) Emission spectrum of H<sub>2</sub>PT ligand.**

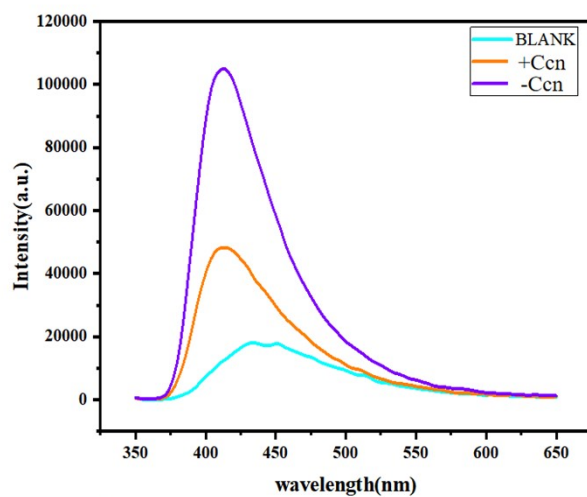

**Fig. S7 Fluorescence spectra of IMU-Zn1 in +Ccn and -Ccn.**

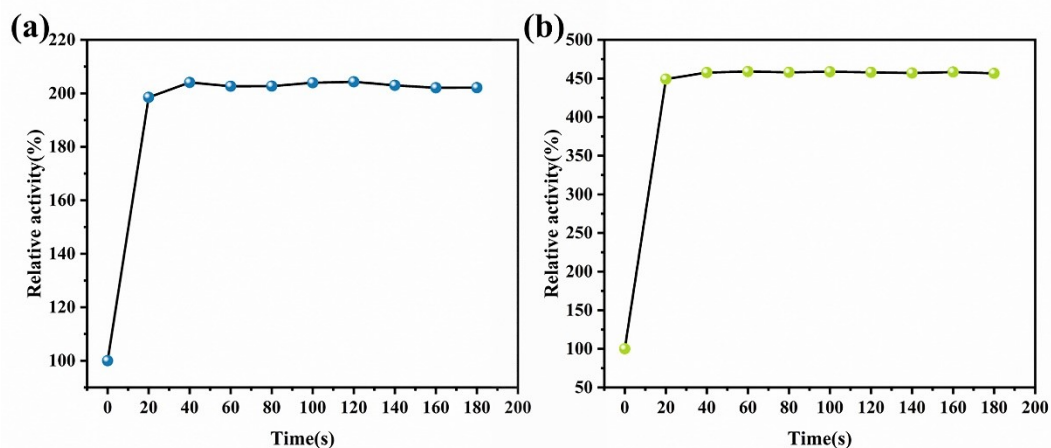

Fig. S8 (a) Time response of IMU-Zn1 to +Ccn; (b) Time response of IMU-Zn1 to -Ccn.

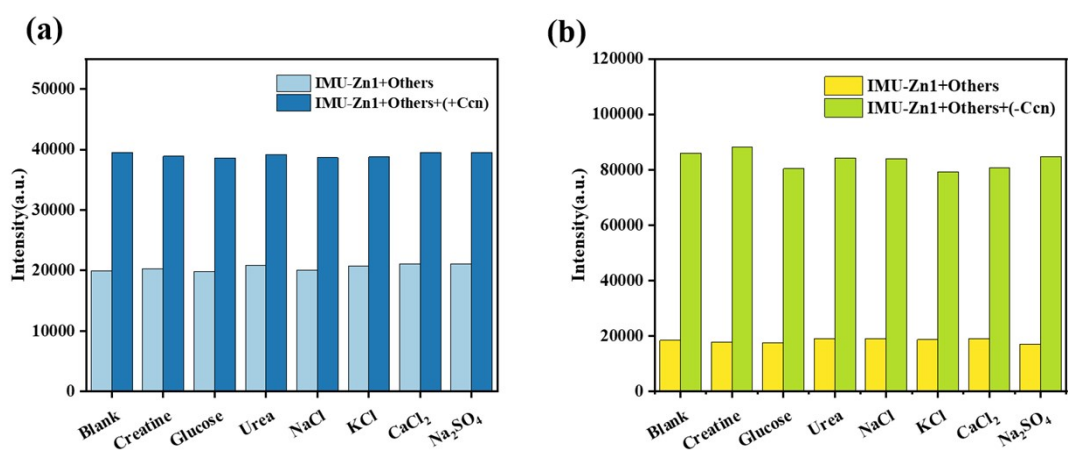

Fig. S9 The anti-interference of IMU-Zn1.

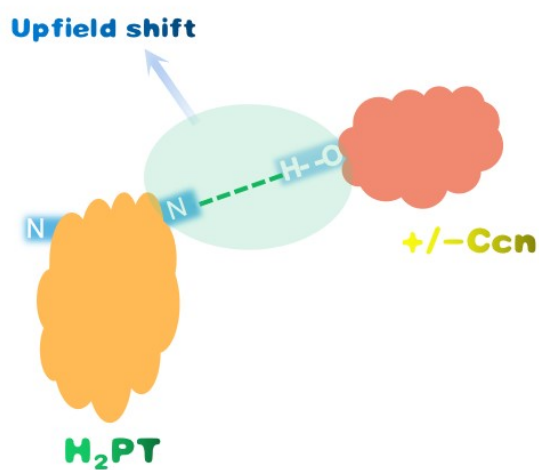

**Fig. S10** Diagram of interaction between H<sub>2</sub>PT and analytes.

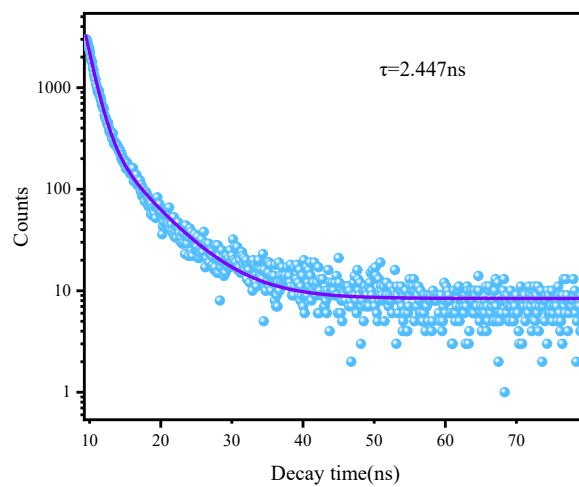

**Fig. S11** Attenuation and fitting curves of fluorescence lifetime of **IMU-Zn1**.

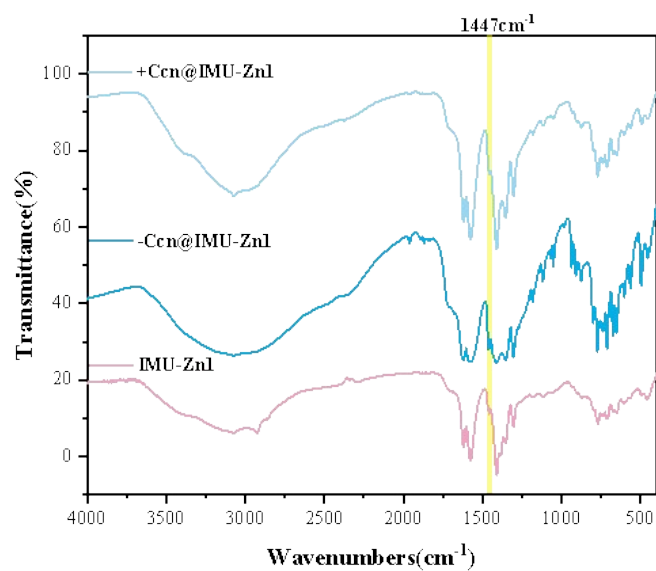

**Fig. S12** IR spectra of +Ccn@IMU-Zn1 and -Ccn@IMU-Zn1.



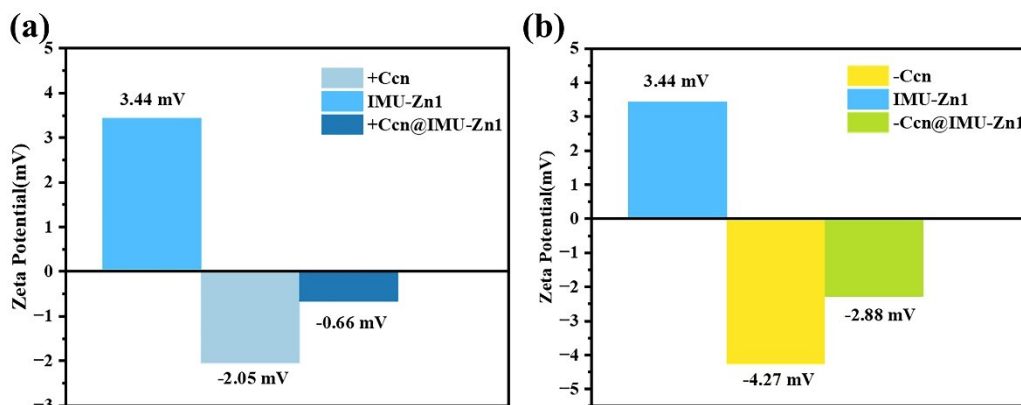

**Fig. S13 (a)** Zeta potential of +Ccn and **IMU-Zn1**; **(b)** Zeta potential of -Ccn and **IMU-Zn1**.

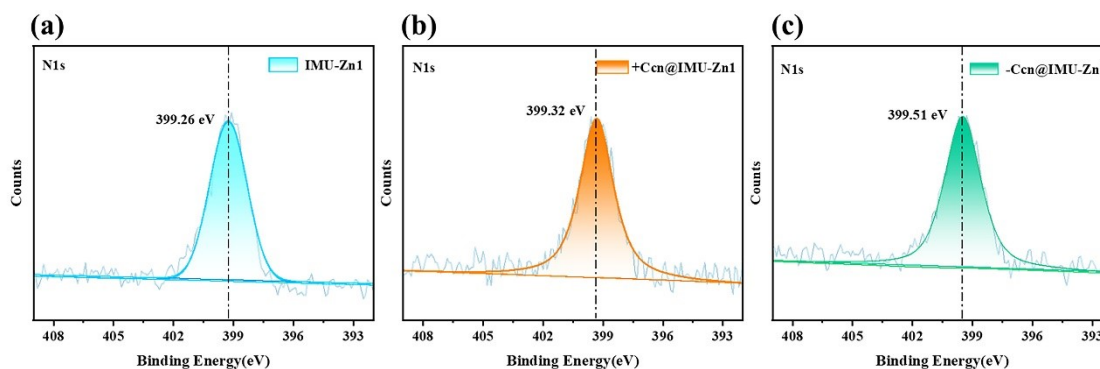

**Fig. S14** 3d XPS peak of N1s in **IMU-Zn1**, **+Ccn@IMU-Zn1** and **-Ccn@IMU-Zn1**

### 3. Supporting Tables

**Table S1** Crystallographic parameters of the **IMU-Zn1** complex.

| Compound              | <b>IMU-Zn1</b>         |
|-----------------------|------------------------|
| CCDC number           | 2361371                |
| Empirical formula     | $C_{12}H_{10}N_2O_6Zn$ |
| Formula weight        | 343.6008               |
| Temperature [K]       | 273.15                 |
| Crystal system        | orthorhombic           |
| Space group           | <i>Ama2</i>            |
| <i>a</i> [Å]          | 16.115(7)              |
| <i>b</i> [Å]          | 12.152(6)              |
| <i>c</i> [Å]          | 6.558(3)               |
| $\alpha$ [°]          | 90                     |
| $\beta$ [°]           | 90                     |
| $\gamma$ [°]          | 90                     |
| Volume/Å <sup>3</sup> | 1284.2(10)             |
| <i>Z</i>              | 4                      |

|                                                                                                                                                |                                                                     |
|------------------------------------------------------------------------------------------------------------------------------------------------|---------------------------------------------------------------------|
| $\rho_{\text{calc}}$ [gcm <sup>-3</sup> ]                                                                                                      | 1.777                                                               |
| $\mu$ [mm <sup>-1</sup> ]                                                                                                                      | 1.943                                                               |
| $F(000)$                                                                                                                                       | 696.0                                                               |
| Radiation                                                                                                                                      | MoK $_{\alpha}$ ( $\lambda=0.71073$ Å)                              |
| 2 $\theta$ range [°]                                                                                                                           | 5.06 to 53.47 (0.79 Å)                                              |
| Index ranges                                                                                                                                   | -17 $\leq$ h $\leq$ 20, -15 $\leq$ k $\leq$ 6, -7 $\leq$ l $\leq$ 8 |
| Reflections collected                                                                                                                          | 2293                                                                |
| Independent reflections                                                                                                                        | 1189 [ $R_{\text{int}} = 0.0403$ , $R_{\text{sigma}} = 0.0565$ ]    |
| Data/restraints/parameters                                                                                                                     | 1189/1/103                                                          |
| Goodness-of-fit on $F^2$                                                                                                                       | 1.070                                                               |
| Final $R$ indexes [ $I \geq 2\sigma(I)$ ]                                                                                                      | $R_1 = 0.0439$ , $wR_2 = 0.1158$                                    |
| Final $R$ indexes [all data]                                                                                                                   | $R_1 = 0.0539$ , $wR_2 = 0.1214$                                    |
| Largest peak/hole [eÅ <sup>-3</sup> ]                                                                                                          | 0.63/-0.62                                                          |
| Flack parameter                                                                                                                                | 0.06(3)                                                             |
| <sup>a</sup> $R_1 = \sum   F_o  -  F_c   / \sum  F_o $ . <sup>b</sup> $wR_2 = [\sum [\omega(F_o^2 - F_c^2)^2] / \sum \omega(F_o^2)^2]^{1/2}$ . |                                                                     |

**Table S2. Selected bond lengths [Å] and angles [°] for IMU-Zn1.**

| IMU-Zn1.   |          |             |          |
|------------|----------|-------------|----------|
| Zn1–O1     | 1.977(6) | Zn1–O3      | 1.917(5) |
| Zn1–O1 A   | 1.977(6) | Zn1–O3 A    | 1.917(5) |
| O1–Zn1–O1A | 94.9(4)  | O3–Zn1–O1A  | 108.0(3) |
| O1–Zn1–O3  | 105.7(2) | O3–Zn1–O3A  | 129.3(4) |
| O1–Zn1–O3A | 108.0(3) | O3A–Zn1–O1A | 105.7(2) |

Symmetry transformations used to generate equivalent atoms:

#1: 1.5-X, +Y, +Z; #2: 1-X, 1-Y, +Z;

**Table S3. Hydrogen bonds for IMU-Zn1 [Å and °].**

| D-H...A      | d(D-H) | d(H...A) | d(D...A) | <(DHA) |
|--------------|--------|----------|----------|--------|
| O1-H1A...O2A | 0.85   | 1.994    | 2.718(8) | 142.3  |
| O1-H1B...N1A | 0.85   | 1.923    | 2.748(8) | 162.9  |

Symmetry transformations used to generate equivalent atoms:

#1: +X, -0.5+Y, -0.5+Z; #2: +X, -0.5+Y, -1.5+Z.

**Table S4. Comparison of detection methods for cinchonine and cinchonidine.**

| Materials                                 | $K_{\text{SV}} / K_{\text{EC}}$ (M <sup>-1</sup> )                                       | Analytes (LOD) (M)    |              | Ref. |
|-------------------------------------------|------------------------------------------------------------------------------------------|-----------------------|--------------|------|
|                                           |                                                                                          | Cinchonine            | Cinchonidine |      |
| Schiff-base Zn <sup>II</sup><br>complex 1 |                                                                                          | $4.38 \times 10^{-7}$ | –            | 3    |
| Zn-MOF-C-Tb                               | $K_{\text{SV}} = 4.66 \times 10^3$<br>(Cinchonine)<br>$K_{\text{SV}} = 3.45 \times 10^3$ | –                     | –            | 4    |

|                |                                               |                       |                       |              |
|----------------|-----------------------------------------------|-----------------------|-----------------------|--------------|
|                | (Cinchonidine)                                |                       |                       |              |
| <b>IMU-Zn1</b> | $K_{EC} = 3.08 \times 10^3$<br>(Cinchonine)   | $2.10 \times 10^{-6}$ | $1.89 \times 10^{-6}$ | This<br>Work |
|                | $K_{EC} = 6.83 \times 10^3$<br>(Cinchonidine) |                       |                       |              |

#### 4. Reference

1. T. Lu and F. Chen, *J. Comput. Chem.*, 2012, **33**, 580-592.
2. W. Humphrey, A. Dalke and K. Schulten, *J. Mol. Graph.*, 1996, **14**, 33-38.
3. I. P. Oliveri and S. Di Bella, *Tetrahedron*, 2011, **67**, 9446-9449.
4. Z. Han, K. Wang, Y. Guo, W. Chen, J. Zhang, X. Zhang, G. Siligardi, S. Yang, Z. Zhou, P. Sun, W. Shi and P. Cheng, *Nat. Commun.*, 2019, **10**, 5117.
